# Supplementary material for: Shape anisotropy induced jamming of nanoparticles at liquid interfaces: a tensiometric study
Source: Royal Society of Chemistry journal article supplement (doi:10.1039/d4na00280f), 2024-01-01
Supplement: d4na00280f1.pdf [file d4na00280f1.pdf]

# Supporting Information to “Shape anisotropy induced jamming of nanoparticles at liquid interface: A tensiometric study”

Chandan Kumar,<sup>†,‡</sup> Suman Bhattacharjee,<sup>¶,‡</sup> and Sunita Srivastava<sup>\*,‡</sup>

<sup>1</sup> <sup>†</sup>*Department of Materials Science and Engineering, Nagoya University, Nagoya, 464-8603,  
Aichi, Japan*

<sup>‡</sup>*Soft Matter and Nanomaterials Laboratory, Department of Physics, Indian Institute of  
Technology Bombay, Mumbai-400 076, India*

<sup>¶</sup>*Centre for Research in Nanotechnology & Science (CRNTS), Indian Institute of  
Technology Bombay, Mumbai-400 076, India*

E-mail: [sunita.srivastava@phy.iitb.ac.in](mailto:sunita.srivastava@phy.iitb.ac.in)

Phone: +91-22-2576-7572

# 1 Contents

|   |   |                                                                           |    |
|---|---|---------------------------------------------------------------------------|----|
| 2 | 1 | Transmission Electron Microscopy (TEM) of AuNR and AuNP                   | S2 |
| 3 | 2 | UV-Visible spectroscopy                                                   | S3 |
| 4 | 3 | Dynamic Light Scattering (DLS) and Zeta Potential measurement             | S4 |
| 5 | 4 | Adsorption kinetics : Linear fitting to determine $K_{ads}$ and $K_{arr}$ | S6 |
| 6 |   | References                                                                | S7 |

## 7 1 Transmission Electron Microscopy (TEM) of AuNR 8 and AuNP

9 Synthesized particles are imaged using transmission electron microscopy (JEOL, JEM-2100F,  
10 FEGTEM 200 kV) as shown in Figure S1(a,c) below. Using ImageJ<sup>1</sup> software aspect ratio  
11 and size distribution for AuNR and AuNP, respectively, are obtained. Gaussian fit of the  
12 histograms shows the average aspect ratio of AuNR is  $\sim 4$  [Figure S1(b)] and the size of  
13 AuNP is  $\sim 16$  nm [Figure S1(d)].

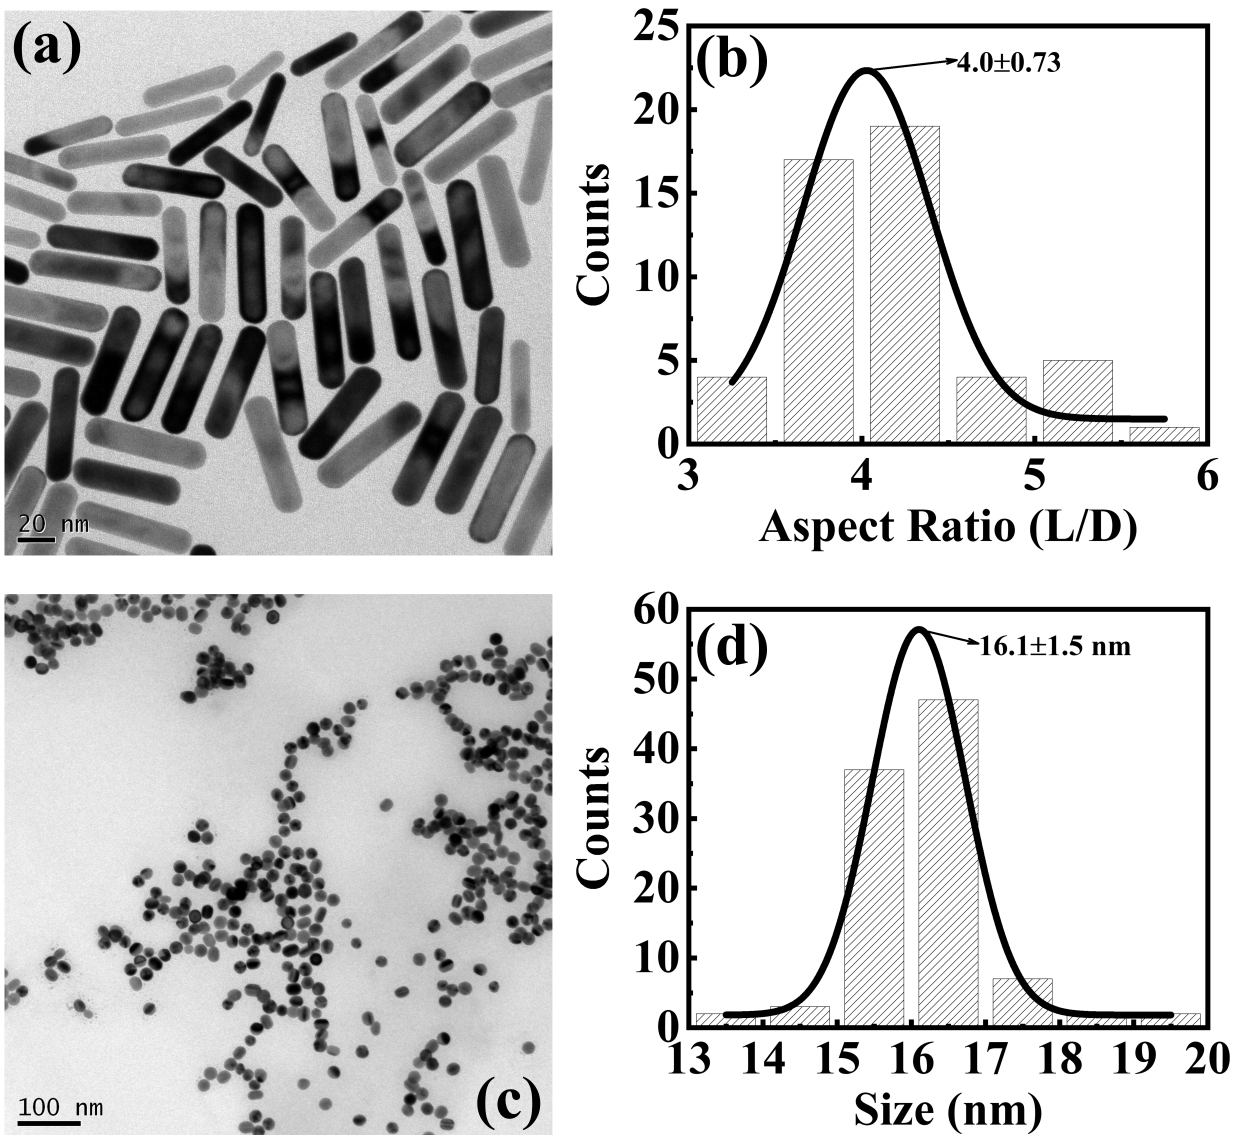

Figure S1: TEM micrographs for synthesized AuNR (a) and AuNP (c) are shown. Scale bars are 20nm and 100nm in (a) and (c), respectively. Size distribution histogram fitted with a Gaussian profile giving estimates of AuNR aspect ratio ( $L/D$ ) in Figure S1(b) and AuNP size in Figure S1(d).

## 2 UV-Visible spectroscopy

UV-visible spectra for AuNR and AuNP colloidal solution are obtained using JASCO V-730 Spectrophotometer. For AuNR [Figure S2(a)], we observe two peaks for longitudinal (LSPR at 819 nm) and transverse (TSPR at 508 nm) plasmon resonance due to the anisotropic

1 geometry. For AuNP, the absorbance peak is at 525 nm [Figure S2(b)]. Using the maximum  
2 absorbance values at LSPR for AuNR and AuNP, concentration is estimated using Beer  
3 Lambert's law.<sup>2</sup>

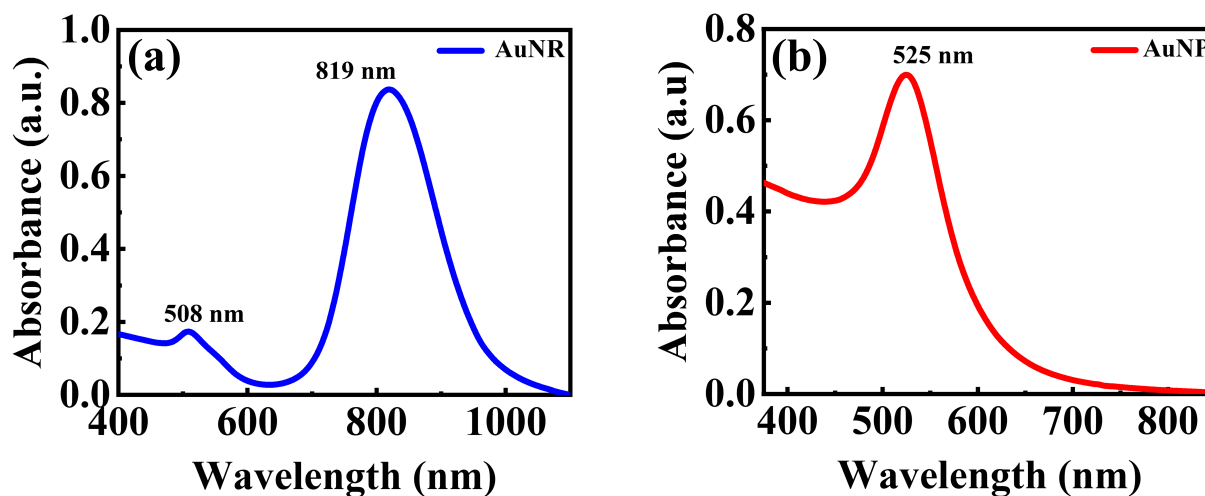

Figure S2: UV-Vis spectra for AuNR (a) and AuNP (b) showing SPR peaks.

### 4 **3 Dynamic Light Scattering (DLS) and Zeta Potential** 5 **measurement**

6 DLS measurements on the colloidal particles are done using Zetasizer NanoZS (Malvern).  
7 Since AuNRs have translational and rotational diffusion constants, an approximate hydrody-  
8 namic size is obtained [Figure S3(a)] which is closer to the size calculated from TEM images.  
9 Zeta potential in Figure S3(b) shows a positive charge on the rods due to CTAB layer.

10

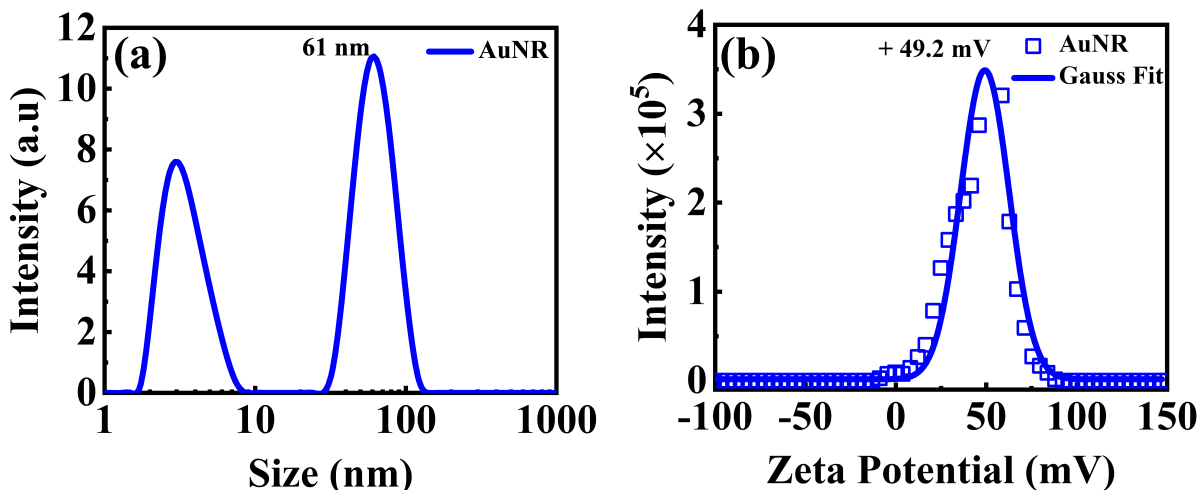

Figure S3: Hydrodynamic size (a) & Zeta potential (b) estimation for AuNR

- 1 Hydrodynamic size of spherical AuNP is estimated correctly [Figure S4(a)]. Zeta poten-
- 2 tial in Figure S4(b) shows a positive charge on the particles due to CTAB layer. Both zeta
- 3 potential values indicate stable colloidal solutions.

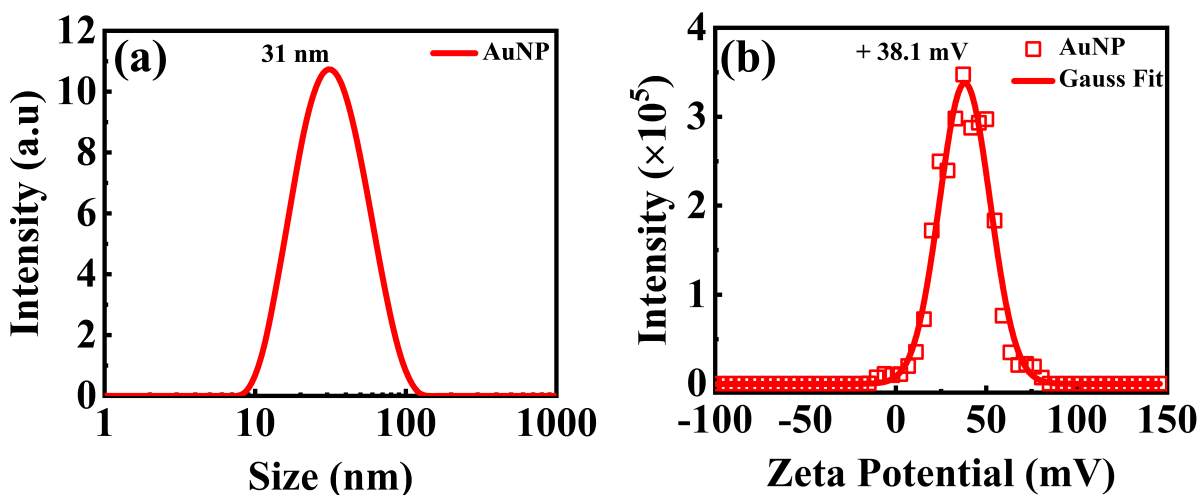

Figure S4: Hydrodynamic size (a) & Zeta potential (b) estimation for AuNP

1 **4 Adsorption kinetics : Linear fitting to determine  $K_{ads}$**   
2 **and  $K_{arr}$**

3 Figure S5 shows an indicative plot for the calculation of the rate constants. From the  $\gamma - t$   
4 plot of both the systems, the data is fitted using the Graham-Phillips equation to find out  
5 the rate constants such as  $K_{ads}$  and  $K_{arr}$ . The first slope signifies  $K_{ads}$  and the latter gives  
6  $K_{arr}$ .

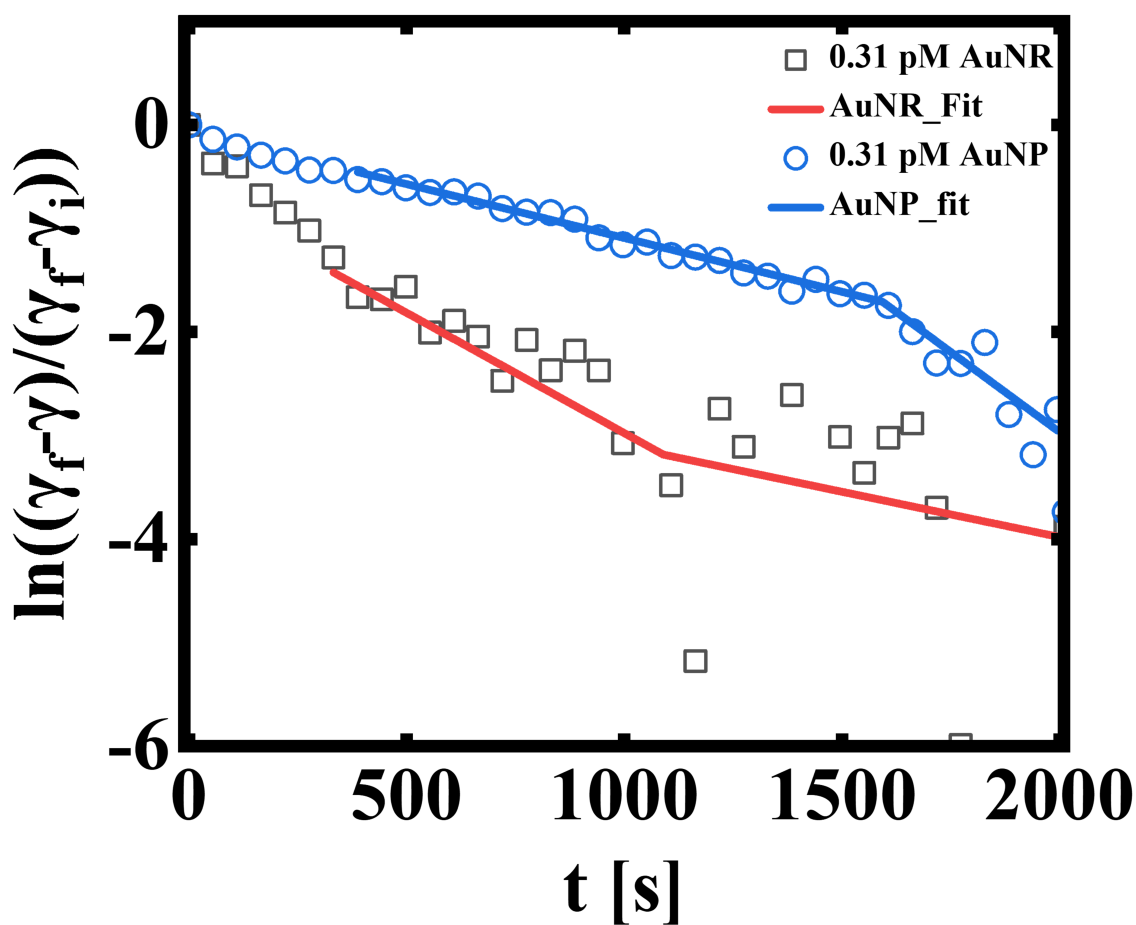

Figure S5: Linear fitting using the Graham-Phillips equation for AuNP and AuNR systems.

## 1 **References**

- 2 (1) Schneider, C. A.; Rasband, W. S.; Eliceiri, K. W. NIH Image to ImageJ: 25 years of  
3 image analysis. *Nature Methods* **2012**, *9*, 671–675.
- 4 (2) McNaught, A. D.; Wilkinson, A., et al. *Compendium of Chemical Terminology*; Blackwell  
5 Science Oxford, 1997; Vol. 1669.
